# Supplementary material
Source: publisher figshare collection journal article supplement (https://sage.figshare.com/ndownloader/files/34139465)
Supplement: Supplementary file 1 [file 34139465]

**Table S1.**

*Sample Search Strategy from Criminal Justice Abstracts (Ebscohost)*

| S19 | S10 AND S16, Limit to Publication Date: 19830101-20190422 | 692 |
| --- | --- | --- |
| S18 | S10 AND S16, Limit to English language only | 709 |
| S17 | S10 AND S16 | 723 |
| S16 | S13 OR S14 OR S15 | 56,687 |
| S15 | “collective efficacy” OR ecology* OR environment* OR Inequality OR Multilevel OR “social context” OR “social factors” | 50,865 |
| S14 | Parolee* N3 (cluster* OR concentrate*) | 3 |
| S13 | s11 N2 S12 | 8,093 |
| S12 | (affluent OR characteristics OR condition* OR context* OR disadvantage* OR dynamics OR econom* OR effect* OR employment OR environment OR factors OR impoverished OR income OR level OR poverty OR racial OR resources OR sociodemographic* OR socioeconomic* OR structur* OR surrounding OR unemployment OR variables ) | 289,227 |
| S11 | (neighborhood* OR communit*) | 69,505 |
| S10 | S1 OR S2 OR S3 OR S4 OR S5 OR S6 OR S7 OR S8 OR S9 | 8,667 |
| S9 | return n2 custody | 46 |
| S8 | parole N3 violat* | 235 |
| S7 | repeat N2 offen* | 4,043 |
| S6 | reoffen* OR re-offen* | 1,674 |
| S5 | reincarcer* OR re-incarcer* | 271 |
| S4 | re-imprison or reimprison OR re-imprisoned or reimprisoned OR re-imprisonment or reimprisonment | 41 |
| S3 | reconviction OR re-conviction OR reconvicted OR re-convicted | 413 |
| S2 | rearrest OR re-arrest OR rearrested OR re-arrested OR rearrests OR re-arrests | 647 |
| S1 | recidivism OR recidivist OR recidivating OR recidivated OR recidivate OR recidivistic OR recidivized | 7,014 |
